# Supplementary material for: Abacavir enhances the efficacy of Doxorubicin via inhibition of histone demethylase KDM5B in breast cancer
Source: Research Square preprint supplement (doi:10.21203/rs.3.rs-6208718/v1), 2025-04-03
Supplement: Supplementary file 1 [file 98fd34bedc0160caeb0408fe.docx]

**Supplementary File**

**Abacavir enhances the efficacy of Doxorubicin *via* inhibition of histone demethylase KDM5B in breast cancer**

Anmi Jose1, Pallavi Kulkarni2, Naveena Kumar AN3, Nawaz Usman3, Gabriel Sunil Rodrigues4, Gautham G Shenoy5, Rama Rao Damerla6, Murali Munisamy7, Bharti Bisht8, Sooryanarayana Varambally9, Manash K Paul10, Neha Arya7, Praveen PN Rao11, Mahadev Rao*1

1. Department of Pharmacy Practice, Manipal College of Pharmaceutical Sciences, Manipal Academy of Higher Education, Manipal 576104, Karnataka, India
2. Department of Biochemistry, All India Institute of Medical Sciences, Bhopal, 462020, Bhopal, Madhya Pradesh, India
3. Department of Surgical Oncology, Manipal Comprehensive Cancer Care Centre, Kasturba Medical College, Manipal Academy of Higher Education, Manipal, Karnataka 576104, India
4. Department of General Surgery, Kasturba Medical College, Manipal Academy of Higher Education, Manipal, Karnataka 576104, India
5. Department of Pharmaceutical Chemistry, Manipal College of Pharmaceutical Sciences, Manipal Academy of Higher Education, Manipal, Karnataka 576104, India
6. Department of Medical Genetics, Kasturba Medical College, Manipal Academy of Higher Education, Manipal 576104, Karnataka, India
7. Department of Translational Medicine, All India Institute of Medical Sciences, Bhopal, 462020, Bhopal, Madhya Pradesh, India
8. Department of Microbiology, Kasturba Medical College, Manipal Academy of Higher Education, Manipal, Karnataka 576104, India
9. Department of Pathology, University of Alabama at Birmingham, Birmingham, AL, USA
10. Department of Radiation Biology and Toxicology, Manipal School of Life Sciences, Manipal Academy of Higher Education, Manipal, Karnataka 576104, India
11. School of Pharmacy, Health Sciences Campus, 200 University Avenue West, University of Waterloo, Waterloo, ON N2L 3G1, Canada

***Corresponding author**: Dr. Mahadev Rao, Professor, Department of Pharmacy Practice, Coordinator, Centre for Translational Research, Manipal College of Pharmaceutical Sciences, Manipal Academy of Higher Education, Manipal 576104, Karnataka, India.

Email: mahadev.rao@manipal.edu

1. **Supplementary Figure 1**


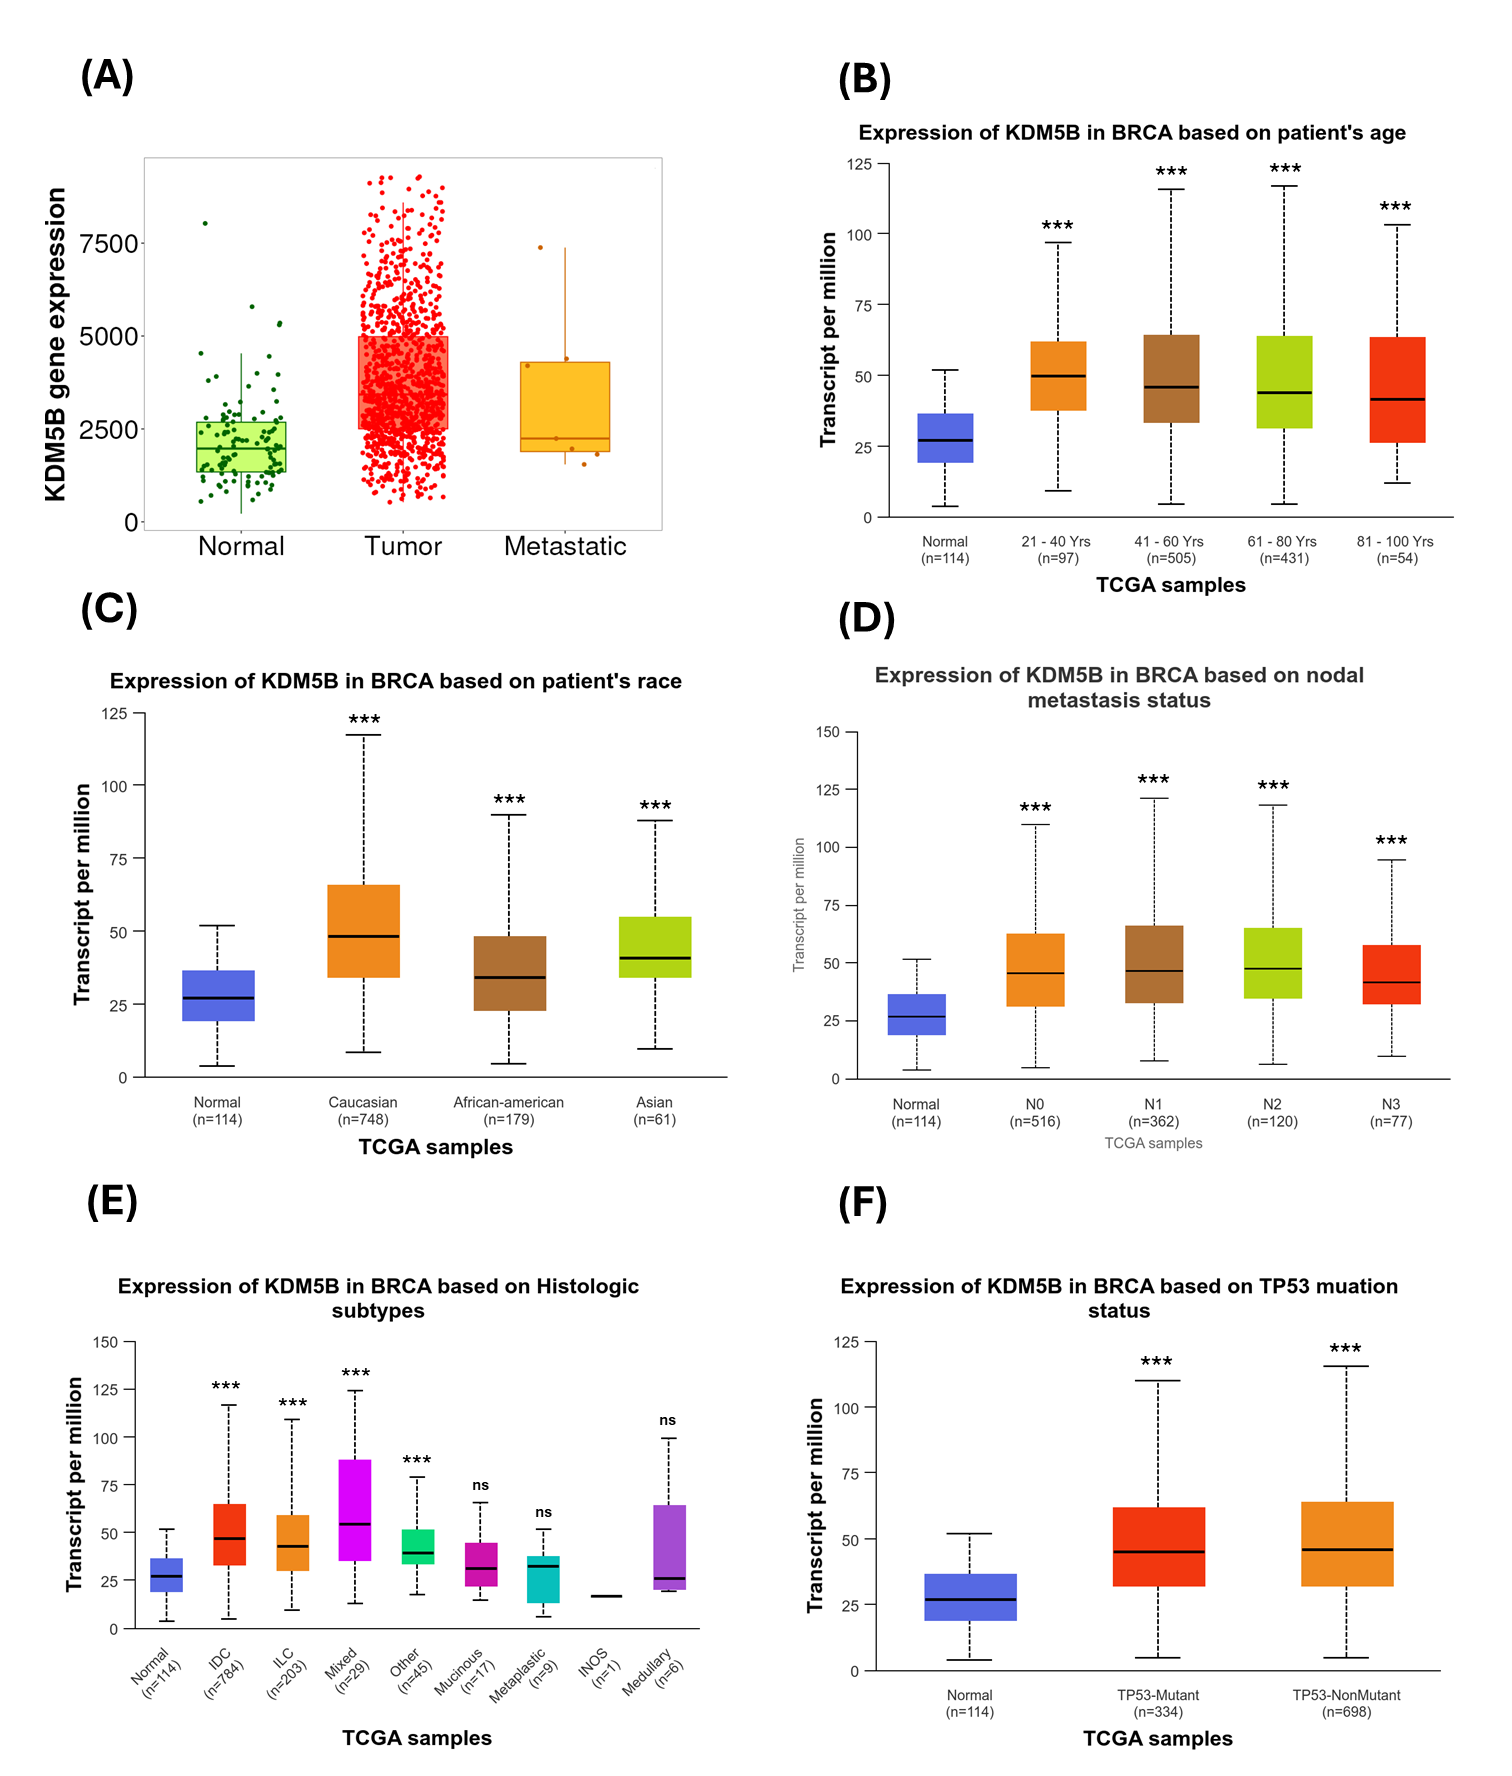


**Fig S1:** **KDM5B expression and its correlation with other clinicopathological parameters**. **(A)** KDM5B gene expression analysis using RNA-Seq data from TNMplot database in breast cancer tumor (n=1097), normal (n=113), and metastatic tissue (n=7) (*P* value< 0.001, Kruskal-Wallis test). **(B-F)** UALCAN analysis of expression profiles of KDM5B in breast cancer across different age groups, patient’s race, nodal metastasis, histological subtypes, and TP53 mutation status. **P* < 0.05; ***P* < 0.01; ****P* < 0.001; ns: not significant.

1. **Supplementary Figure 2**


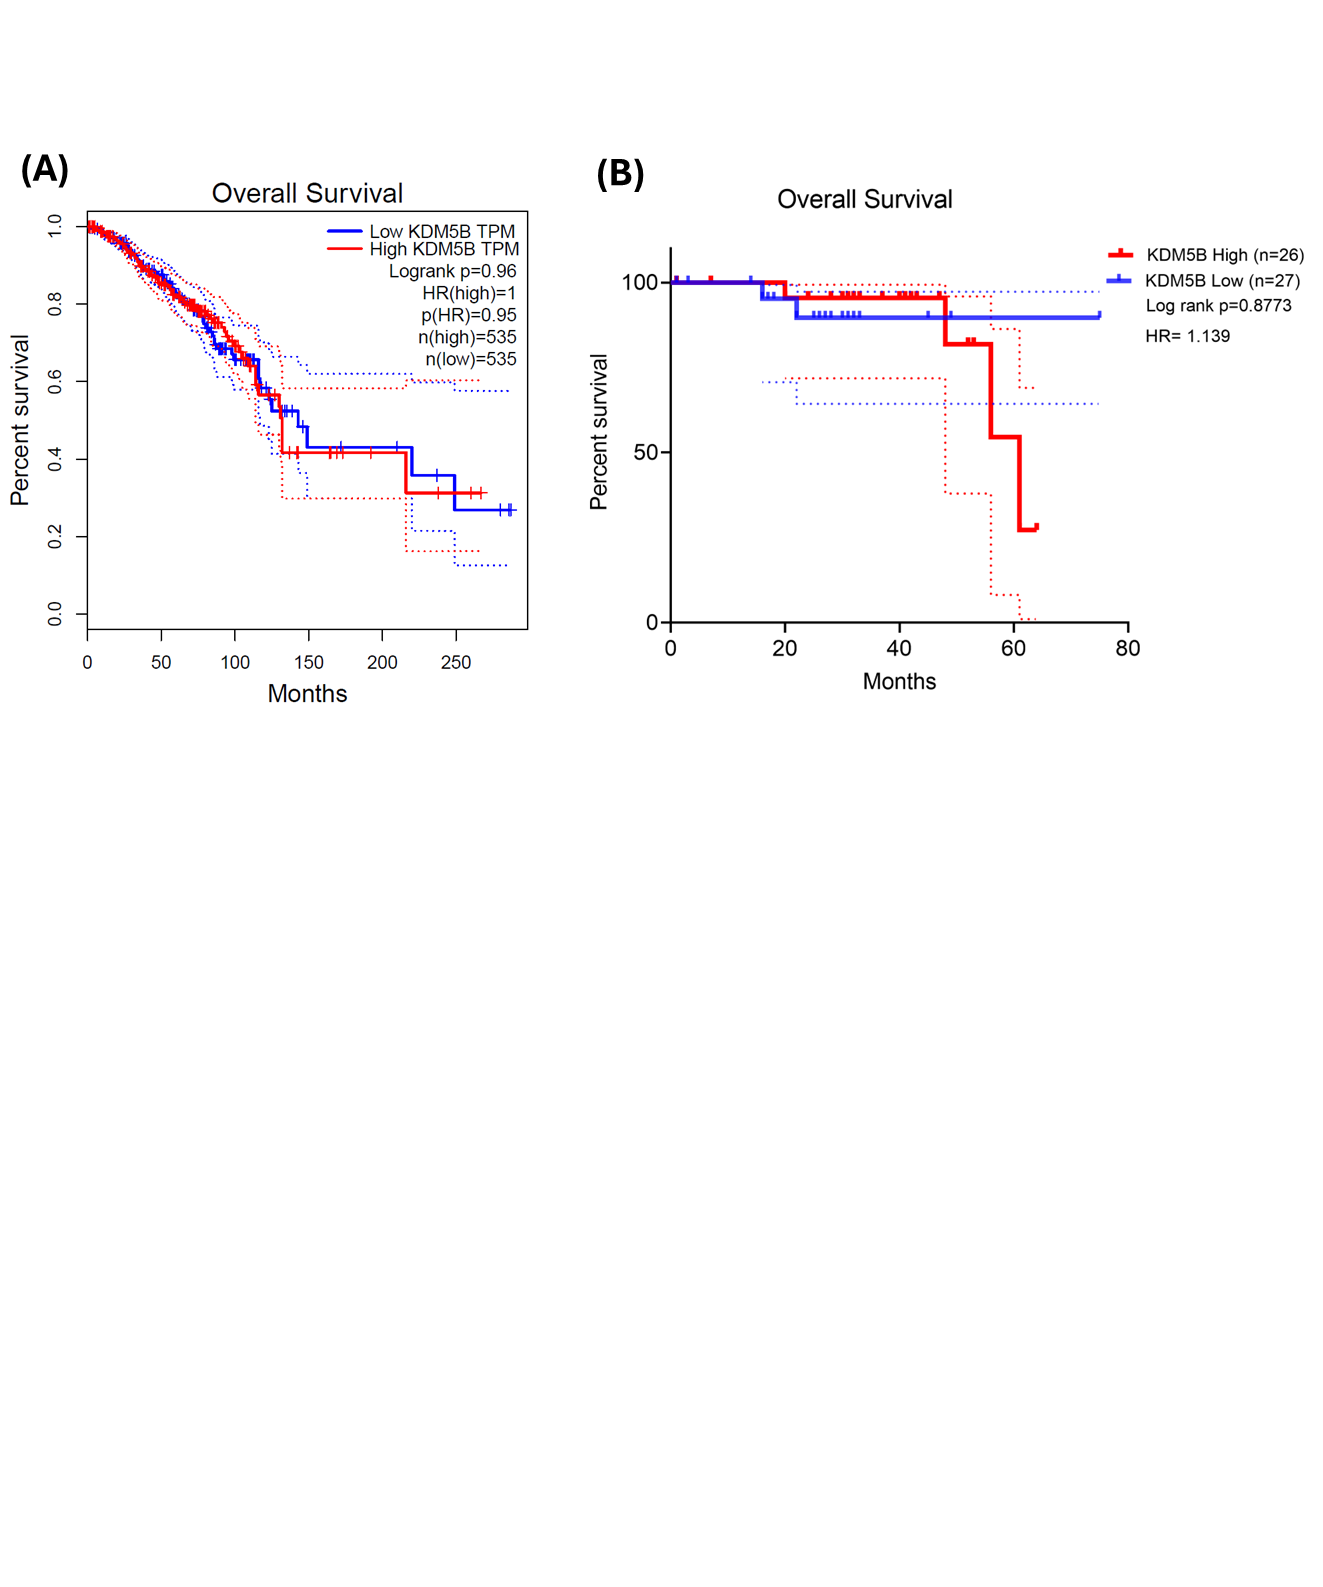


**Fig S2:** **Overall survival in breast cancer patients in relation to KDM5B mRNA expression** **(A)** OS in breast cancer patients in relation to mRNA expression was assessed in silico through GEPIA. Kaplan–Meier plots and log-rank test p values were generated computationally. Patient groups were stratified based on median KDM5B gene expression values extracted from TCGA-BRCa datasets.

1. **Supplementary Figure 3**


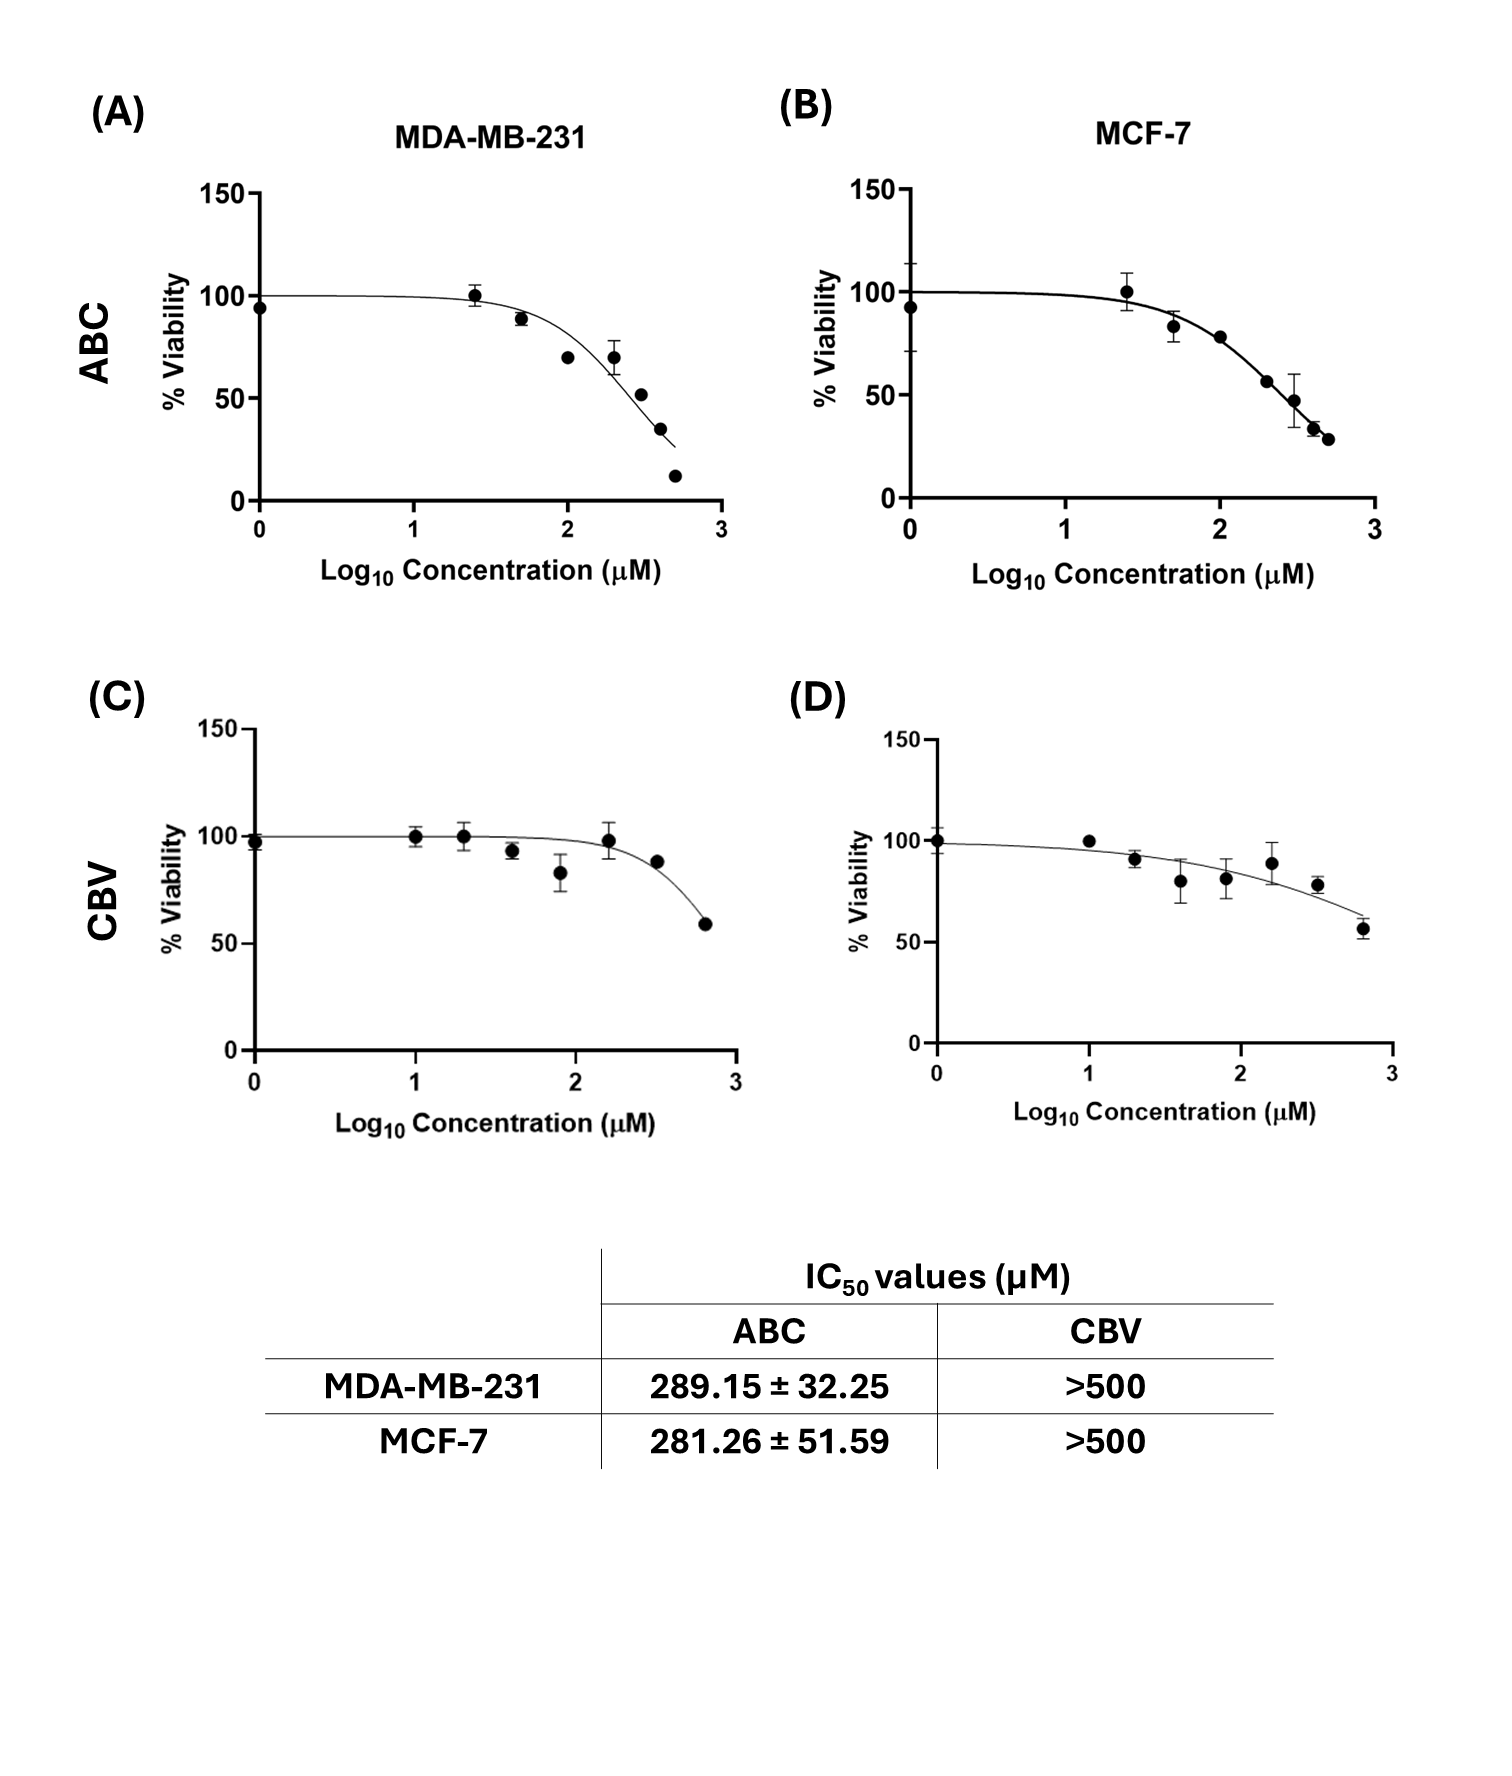


**Fig S3:** **Cytotoxicity of ABC and CBV in MDA-MB-231 and MCF-7 cell lines.** Representative images for ABC and CBV cytotoxicity study by MTT assay. IC50 values represent three independent experiments, expressed in mean ± SD.

1. **Supplementary Figure 4**


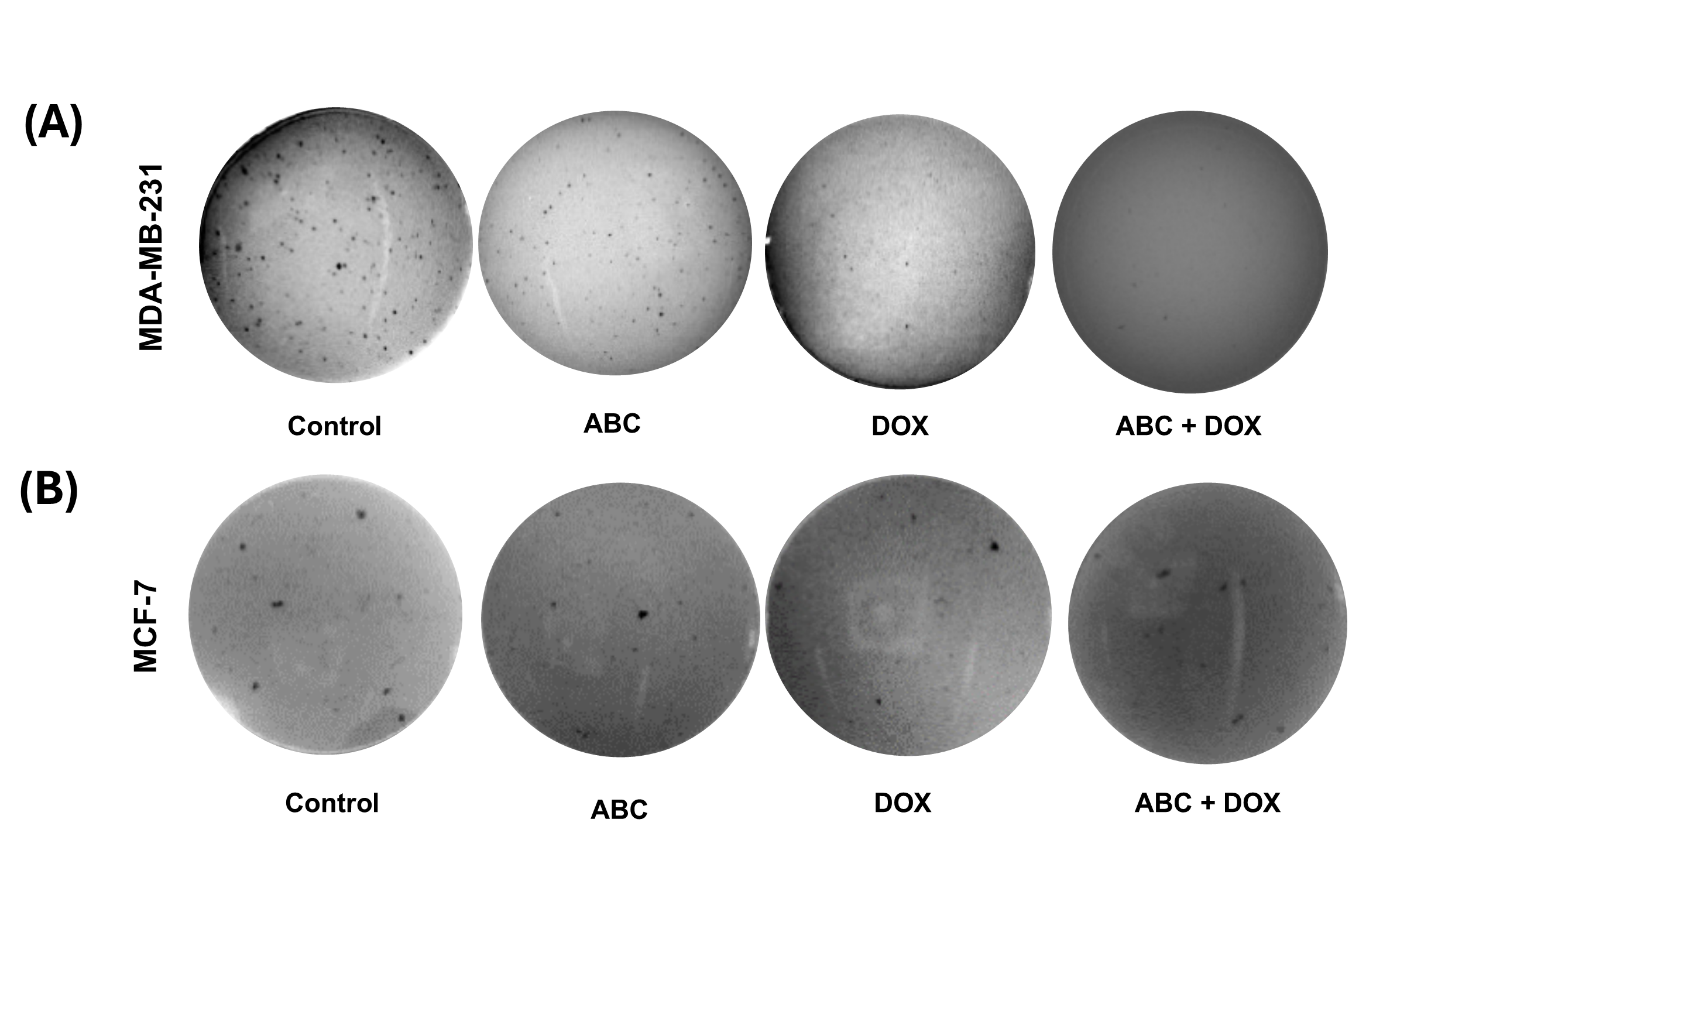


**Fig S4:** **Soft agar colony forming assay.** Images of soft agar wells colony formation for treatment groups **(A)** MDA-MB-231 and **(B)** MCF-7**.**

1. **Supplementary Figure 5**


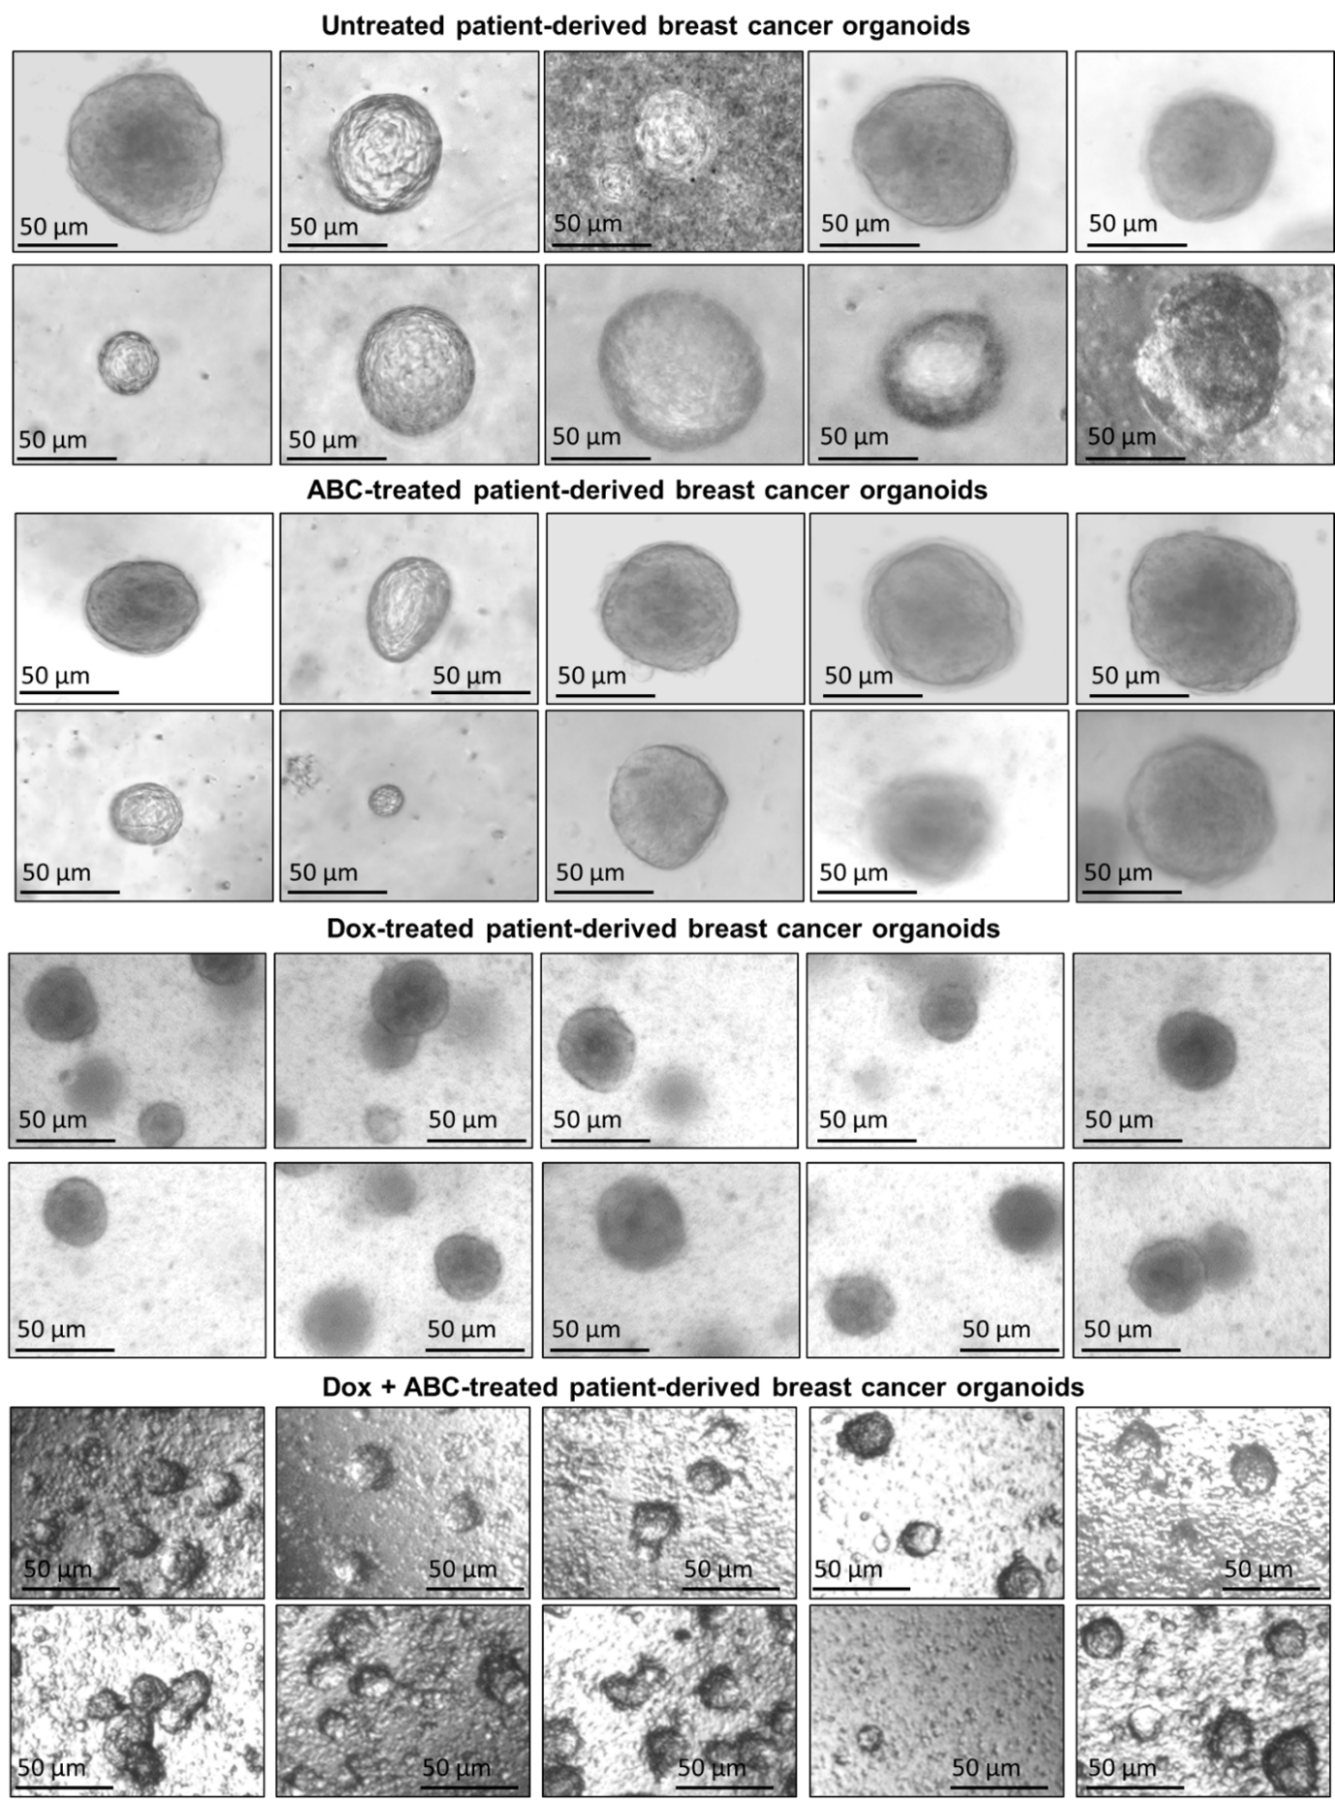


**Fig S5:** **Patient-derived breast cancer organoids.** Representative bright-field patient-derived breast cancer organoid images used for the data analysis are shown.
